# Predicting the fitness costs of complex mutations

Pablo Yubero<sup>1</sup> and Juan F. Poyatos<sup>1</sup>

<sup>1</sup>Logic of Genomic Systems Lab (CNB-CSIC). Email: [jpoyatos@cnb.csic.es](mailto:jpoyatos@cnb.csic.es)

## ABSTRACT

The fitness cost of complex pleiotropic mutations is generally difficult to assess. On the one hand, it is necessary to identify which molecular properties are directly altered by the mutation. On the other, this alteration modifies the activity of many genetic targets with uncertain consequences. Here, we examine the possibility of addressing these challenges by identifying unique predictors of these costs. To this aim, we consider mutations in the RNA polymerase (RNAP) in *Escherichia coli* as a model of complex mutations. Changes in RNAP modify the global program of transcriptional regulation, with many consequences. Among others is the difficulty to decouple the direct effect of the mutation from the response of the whole system to such mutation. A problem that we solve quantitatively with data of a set of constitutive genes, which better read the global program. We provide a statistical framework that incorporates the direct effects and other molecular variables linked to this program as predictors, which leads to the identification that some genes are more suitable predictors than others. Therefore, we not only identified which molecular properties best anticipate costs in fitness, but we also present the paradoxical result that, despite pleiotropy, specific genes serve as better predictors. These results have connotations for the understanding of the architecture of robustness in biological systems.

## INTRODUCTION

One recurrent problem in Biology is to understand the impact that mutations have on fitness (Griffiths et al. 2015). Admittedly, this topic has been the center of most recent research in Molecular Biology, with a catch. The majority of mutations, for which we have a well-defined knowledge of the underlying causes of their fitness costs, are "simple". By simple, we refer to mutations in molecular elements with a specific function, e.g., an enzyme catalyzing a particular metabolic reaction or a transcription factor linked to the activation of a given gene.

We will not examine here fitness costs of simple mutations but alternatively of those considered "complex". Complex mutations can be commonly established by the pleiotropic action of the molecular agents experiencing the mutation (Dudley et al. 2005). For instance, these agents could refer to a core element of the metabolic or expression cellular machinery, whose function is recognized to be highly pleiotropic. One way to further outline this definition is to add that the said molecular element is active in different contexts (He and Zhang 2005), i.e., that it presents a characteristic *environmental fitness cost map*. In this map, one represents pairs of fitness values for both the wild type (WT) and a given mutant in a set of environmental conditions (Fig. 1A). Impairment of a pleiotropic agent should lead to a proportional decrease in fitness characterized by a global scale factor compared to simple mutations that uniquely display fitness costs in specific situations (Fig. 1B).

In this work, we initially exemplify these concepts using a genome-wide computational model of *Escherichia coli*'s metabolism (Feist et al. 2007). We then consider the RNA polymerase (RNAP) as experimental model. Three different mutations of the gene *rpoB*, which encodes the  $\beta$  subunit of the RNAP, follow the characteristic environmental fitness cost map of a complex mutation. Indeed, mutations in *rpoB*, usually obtained in response to rifamycins (Rif) (Goldstein 2014) –a class of antibiotics–, have been studied in many species and they entail a long list of pleiotropic effects (Jin and Gross 1989; Tóth et al. 2003; Cai et al. 2017; Karthik et al. 2019).

Once we define these mutations as complex, we then ask what set of molecular properties could be *a priori* relevant to understand their cost in fitness. We thus hypothesize several features, which

47 organize in two broad categories, linked to the global program of transcription and the alarmone  
48 (p)ppGpp, or ppGpp onwards.

49 The former is motivated by the ubiquitous role of the RNAP in gene expression and its coupling  
50 to the growth rate. In fact, early works attributed fitness costs to a decreased transcriptional  
51 efficiency of the RNAP in *E. coli* (Reynolds 2000), while subsequent studies found larger, genome-  
52 wide, transcriptional reprogramming in *Pseudomonas Aeruginosa* (Qi et al. 2014), *Mycobacterium*  
53 *Tuberculosis* (Trauner et al. 2018) and *E. coli* (Wytock et al. 2020) that was not clearly connected  
54 to these costs. Our work will enable us to reexamine these issues.

55 The second broad category includes different features of the interaction between the RNAP and  
56 ppGpp mediated by the gene *dksA* (Paul et al. 2004; Irving and Corrigan 2018; Sanchez-Vazquez  
57 et al. 2019). Notably, the RNAP associated with *rpoB* mutants was found to work like a stringent  
58 RNAP (Zhou and Jin 1998), and an altered stringent response was held responsible for fitness costs  
59 in *E. coli* (Wytock et al. 2020). On top of all, the concentration of ppGpp tightly controls optimal  
60 resource allocation and hence, growth rate (Zhu and Dai 2019).

61 Finally, we quantify all these properties in a collection of constitutive genes as "reporters".  
62 These genes are useful for reading the RNAP regulatory signal since they do not present any class  
63 of specific regulation (Schaechter et al. 1958; Maaløe 1979).

64 Armed with this data collection, we develop a quantitative framework to predict fitness costs.  
65 This leads us to reconsider earlier results. Transcriptional efficiency, i.e., the rate of mRNA  
66 production does emerge as a relevant determinant. However, comparing transcription levels between  
67 a WT and a mutant that grows at a slower rate calls for special care. Indeed, empirical laws of  
68 resource allocation show that gene expression in general, and transcriptional promoter activity in  
69 particular, are structurally dependent on the availability of global resources, which in turn, impact  
70 growth rate (Liang et al. 1999; Klumpp and Hwa 2008; Klumpp et al. 2009). This is all captured  
71 in our results.

72 Note that while in this example we had some knowledge of the biology involved, in general, our  
73 approach does not necessarily need a mechanistic rationale to select a particular predictor. And,

74 although this could seem a significant drawback, it can, in turn, serve to guide research in situations  
75 where the origin of fitness costs is unknown. The statistical model can potentially integrate any  
76 number of predictors without prior knowledge about their relevance. In such a case, however,  
77 the number of experimental points needed to distinguish spurious correlations from significant  
78 ones would quickly increase. These are common problems, of course, in other theoretical and  
79 applied areas where multiple regression analysis is applied, e.g., Quantitative Genetics (**Falconer  
80 and Mackay 1996**) or Ecology (**Johnson and Omland 2004**).

81 More broadly, our work contributes to the general program of predicting cellular phenotypes  
82 from a molecular basis by effectively decreasing the dimensionality assumed to determine such phe-  
83 notypes and has implications for our comprehension of the architecture of robustness in biological  
84 systems.

## 85 **RESULTS**

### 86 **Complex mutations display global fitness costs**

87 We first explore complex mutations *in silico*, using a genome-scale metabolic model. Specifi-  
88 cally, we employed one convenient model of *Escherichia coli* that incorporates 1260 open reading  
89 frames (ORFs) and 2077 reactions (**Feist et al. 2007**). We simulate the effect of a mutation on a  
90 given enzyme by constraining the fluxes of the reactions in which it participates. Then, we compute  
91 the fitness of the WT and mutant strains in a minimal medium supplemented with one of 174 carbon  
92 sources (Fig. 1A, Methods). This enables us to distinguish between a global effect of the mutation,  
93 and specific gene-environment interactions through the environmental fitness cost map (Fig. 1B).

94 Enzymes involved in the energetic regulation of the metabolism are potential candidates for  
95 complex mutations. As a case study, we examined a series of *nuoB* mutants, an oxidoreductase  
96 which is part of the respiratory chain, that spanned the entire range of the effect of a mutation:  
97 from unconstrained (WT) to null (knockout) flux. Figure 1C indicates that mutants manifest a  
98 stronger decrease in *relative global fitness* ( $\alpha$ ;  $\alpha < 1$  indicating fitness costs) for larger effects of the  
99 mutation. In the limiting case, when the reactions are turned off, we obtain the relative global  
100 fitness of the *nuoB* knockout (83%). Note that the complex character of these mutations is linked

101 to a considerable reorganization of metabolic fluxes (Fig. 1D; see Supplementary Text and Fig. S1  
102 for further examples and a comprehensive discussion of these mutations).

103 Overall, complex mutations manifest themselves in a multitude of different environments and  
104 are not specific to a particular external cue. This highlights the broader reach of these mutations  
105 and their coupling to core enzymes involved in cell growth.

### 106 **Mutations in *rpoB* are complex**

107 We next establish how RNAP mutants represent a well-grounded experimental model system  
108 for complex mutations given RNAP's essential role during gene expression and cellular growth.  
109 Specifically, we consider the WT strain REL606 of the bacterium *E. coli* (Barrick et al. 2009) and  
110 three mutant derivatives in the *rpoB* gene (with the following amino acid substitutions: H526L,  
111 S512Y, and Q513P) that have been selected experimentally through Rif resistance (Garibyan et al.  
112 2003; Jin and Gross 1988).

113 To obtain an experimental environmental fitness cost map, we measured the growth rate of the  
114 four strains in M9 minimal media with different carbon sources (Methods). Figure 2 shows this  
115 map for the three mutants. We observe that while the derivative H526L (Fig. 2A) exhibits no fitness  
116 cost, S512Y (Fig. 2B) and Q513P (Fig. 2C) exhibit mild 4% and large 24% costs, respectively. This  
117 global response is similar to the one produced by complex mutations in the genome-scale metabolic  
118 model in the previous section. In this case, since these mutations correspond to RNAP (localized  
119 in the *rpoB* gene), we can characterize a set of molecular features directly related to the change in  
120 transcriptional performance. Ultimately, we will assess these features as potential candidates for  
121 anticipating the fitness cost of complex mutations in a statistical model.

### 122 **Mutations in *rpoB* alter the global transcriptional program**

123 We quantified changes in the transcriptional activity of the RNAP by measuring the promoter  
124 activity (PA), i.e., the rate of mRNA production. As gene expression is strongly dependent on the  
125 growth rate, and consequently on the availability of global resources (Liang et al. 1999; Klumpp  
126 et al. 2009), changes in PA observed in the mutants present two possible causes. One is associated  
127 to a decrease in growth rate, while a second is directly linked to changes in the functional activity

128 of the mutant RNAP (Utrilla et al. 2016). To uncouple these effects, we measured PA as a function  
129 of growth rate  $\mu$  during balanced growth in multiple carbon sources (Fig. 3A). We introduced the  
130 notion of the *total* and *direct* promoter activity changes  $PA_T$  and  $PA_D$ , respectively (Fig. 3B). While  
131  $PA_T$  measures the difference in PA between the WT and a mutant in a given condition (and different  
132 growth rates),  $PA_D$  is the expected change in PA between the WT and a mutant when growing at  
133 the same rate (and different environmental conditions). This second measure quantifies in this way  
134 the potential change in the activity of the mutated RNAP controlling for changes in the availability  
135 of global resources due to fitness costs.

136 We experimentally measure PA in all strains as the accumulation rate of a reporter green  
137 fluorescent protein (GFP) of a selected set of promoters (Methods). We selected eleven *constitutive*  
138 promoters available in a reporter plasmid library (Zaslaver et al. 2006). Constitutive genes are  
139 particularly suitable because their expression does not rely on the concentration of any specific  
140 transcription factor, and thus they read the availability of global resources and the performance  
141 of the pool of RNAPs (Schaechter et al. 1958; Maaløe 1979; Klumpp and Hwa 2008). We then  
142 model the growth-rate dependencies of promoter activities,  $PA(\mu)$ , from PA measurements during  
143 exponential growth in eight different media (Methods).

144 Figure 3C shows the growth-rate dependencies of the promoter activities of the selected genes,  
145 in all strains, together with the best fit to a Michaelis-Menten equation  $PA(\mu) = V_m\mu/(K_m + \mu)$  with  
146 parameters  $V_m$ , maximum expression, and  $K_m$ , growth rate at which PA is half-maximal (Fig. 3A,  
147 Methods). We recovered not only that, in general, each promoter follows a specific profile with  
148 different parameters  $V_m$  and  $K_m$ , but also that some of them reside in the linear regime with large  
149  $K_m$  (Liang et al. 1999; Gerosa et al. 2013; Yubero and Poyatos 2020).

150 Most importantly, the activity of promoters in the RNAP mutant strains still follow hyperbolic  
151 patterns although different across strains. We found a significant tendency of H526L and S512Y  
152 towards smaller values of  $V_m$  whereas Q513P displayed a general decrease in  $K_m$  (Fig. S2A-  
153 B). However, the quantitative change in these parameters are mutation- and promoter-specific.  
154 Therefore, changes in these profiles, i.e., in the global transcriptional program, are candidates for

155 predictors of fitness costs.

156 The availability of a predictive model of  $PA(\mu)$  for all promoters in all strains enables us to  
157 distinguish between the direct effect of a mutation,  $PA_D$  to the total change in promoter activity  $PA_T$ .  
158 Interestingly, in most promoters, we observe significant direct effects. Even if RNAP mutations do  
159 not produce fitness costs, as in strain H526L, most promoter activities are significantly altered in a  
160 consistent manner across environments ( $> 80\%$ , Fig. S2C-H). Hence, apart from the total effects  
161 on PA, we also consider separately the direct effects as potential fitness predictors.

### 162 **Mutations in *rpoB* alter the action of ppGpp-RNAP**

163 The performance of the RNAP is strongly dependent on its interaction with the alarmone ppGpp  
164 playing a pivotal role in controlling growth rate in both minimal and rich media (Irving and Corrigan  
165 2018; Potrykus et al. 2011; Zhu and Dai 2019) and during the stationary phase (Hirsch and Elliott  
166 2002). Besides, changes in the concentration of ppGpp, together with the presence of *dkxA*, alters  
167 the genome-wide transcriptional pattern with profound consequences in resource allocation (Paul  
168 et al. 2004; Zhu and Dai 2019; Sanchez-Vazquez et al. 2019). Since some *rpoB* mutants also  
169 display defective RNAP-ppGpp action (Zhou and Jin 1998), we posit that mutations should also  
170 impact both growth and transcription during the stringent response at the exit of the exponential  
171 phase, and during the stationary phase.

172 Thus, we considered the following three proxies to quantitatively assess alterations in RNAP-  
173 ppGpp interactions: the promoter activity and protein level during stationary phase and the de-  
174 deceleration in growth rate during the stringent response. The first assesses the transcriptional  
175 reprogramming in stationary phase. The second is a measure of the aggregate effect of PA dereg-  
176 ulation during both balanced growth and stationary phase. Finally, the deceleration rate measures  
177 the efficiency of RNAP-ppGpp in arresting growth.

178 Firstly, we measured the promoter activities in stationary phase during the last two hours of the  
179 experiment ( $PA_f$ , Fig. 4A; note that other time windows produce qualitatively similar results). This  
180 parameter describes the appropriate ability of the pair RNAP-ppGpp to reprogram transcription  
181 when nutrients are depleted. We observe that only a subset of 4, 1, and 3 promoters in strains



182 H526L, S512Y and Q513P, respectively, have a significant under/over-activity in stationary phase  
183 across different growth media.

184 Secondly, in analogy to  $PA_f$ , we measure the protein level also in stationary phase ( $p_f$ , Fig. 4E)  
185 to assess the combined effect of reduced promoter activity and growth rate. We find that these  
186 are more often altered than  $PA_f$ , although the responses are still mutation- and promoter-specific  
187 (Fig. 4F-H). Note that  $p_f$  relative to the WT, tend to be negative in strains H526L and S512Y as  
188 opposed to Q513P.

189 Finally, we used the deceleration rate as a proxy of the interaction RNAP-ppGpp at the onset of  
190 the stringent response, given its fundamental role in arresting growth at the exit of the exponential  
191 phase. We measure the deceleration rate as the slope of the linear fit to the instantaneous growth  
192 rate during 4h after the exponential phase (Fig. 4I, again, other time windows produce similar  
193 results). Unsurprisingly, across all strains we observed a strong negative linear correlation between  
194 the deceleration rate and the growth rate during balanced growth (Fig. 4J). Thus, reaching a larger  
195 growth rate during exponential phase leads to a faster deceleration rate during growth arrest. Then,  
196 we searched for changes in the *normalized* deceleration rates across mutants, which controls for  
197 the respective exponential phase growth rates. Figure 4K shows that both strains with fitness  
198 costs display a significantly reduced normalized deceleration rate with respect to the WT across  
199 environments.

## 200 **A statistical model for complex fitness predictions**

201 The characterization of all previous features equipped us with the necessary data to introduce  
202 a statistical model capable of explaining the fitness costs of three *rpoB* mutants in eight different  
203 growth media from specific molecular determinants. Given the uncoordinated changes in expression  
204 observed in the previous sections, not only do we seek which determinants are best suited for fitness  
205 costs prediction but also of which reporter genes.

206 Specifically, we considered the following predictors related to gene expression: the total and  
207 direct promoter activity changes  $PA_T$  and  $PA_D$ , respectively; the global transcriptional program  
208 parameters  $V_m$  and  $K_m$ ; the promoter activity during stationary phase  $PA_f$ ; the protein level during



209 stationary phase  $p_f$ , and the normalized deceleration rate during growth arrest  $\partial_t \mu$ . The model  
210 describes the relative growth rate of mutants as a function of the relative change of predictors. The  
211 expression for each gene, in Wilkinson notation, is:

$$212 \quad \frac{\mu - \mu_{wt}}{\mu_{wt}} \sim 1 + \sum_i \frac{p_i - p_{i,wt}}{p_{i,wt}}, \quad (1)$$

213 where  $\mu$  is the growth rate;  $p_i$  is the  $i$ -eth predictor; the subscript  $wt$  denotes the WT strain  
214 and 1 refers to a constant intercept. Therefore, a positive parameter estimate implies that the  
215 relative change of the predictor correlates positively with the relative change in the growth of the  
216 mutant (Fig. S3 shows all cross-correlations between variables). Each model integrates data of the  
217 three mutants during growth in the eight media, fitting a total of 24 points.

218 With the statistical model, we seek which genes best describe the fitness changes and with  
219 which combinations of predictors. To do so, we used an algorithm with a step-wise addition and  
220 subtraction of predictors to an initially constant model following Bayes' information criterion to  
221 prevent overfitting. Figure 5 and Table 1 show the results, where we observe that all promoters  
222 reach a convenient root mean squared error (RMSE) and  $R^2_{adj}$  (Fig. 5A), with the exception of *corA*,  
223 an ion transporter; *pyrB*, part of the pyrimidine biosynthesis pathway; and *pcnB* involved in RNA  
224 polyadenylation.

225 Moreover, the structure of the best models for each gene is represented in Fig. 5B. We observe  
226 a clear pattern of  $PA_T$  and  $PA_D$  as the principal predictors of fitness costs. Interestingly, the  
227 coefficients for  $PA_D$  and  $PA_T$  have opposite signs across all promoters studied, likely highlighting a  
228 general mechanism. On the one hand, a positive coefficient of  $PA_T$  implies that mutations in *rpoB*  
229 preserve the general shape of  $PA(\mu)$  profiles as a monotonically increasing function (Fig. S4A). On  
230 the other hand, a negative coefficient of  $PA_D$  highlights that for a fixed growth rate, larger fitness  
231 costs are associated with the overexpression of constitutive promoters (Fig. S4B). This effect is clear  
232 when observing the  $PA(\mu)$  profiles of the strain with the largest fitness cost (Q513P in Fig. 3C).

233 Overall, we find that a multivariate regression with as little as four (median) predictors antici-  
234 pates the fitness costs of different *rpoB* mutants growing in a variety of carbon sources.

## 235 DISCUSSION

236 One encounters three potential problems when characterizing the fitness costs of complex  
237 mutations: 1/to define which molecular elements are likely subjects of complex mutations, 2/to  
238 recognize which of the molecular features altered by these mutations are driving the costs, and  
239 3/to identify whether some specific target elements (of the molecular agent) can act as a distinctive  
240 reporter of such modified features and, in this way, of the costs. We find an answer to the first  
241 problem with the use of the environmental fitness cost map and to the second by dissecting a set  
242 of potential predictors, quantified in reporter genes, that are ultimately integrated into a statistical  
243 model. By identifying patterns in the models of a variety of genes, this approach also helps us  
244 to resolve the third problem: which targets could be most relevant to predict the fitness costs of  
245 mutations.

246 That we observe complex mutations in a metabolic model supports the idea that they are  
247 likely prevalent in regulatory networks and hence, in biological systems. Moreover, we verify that  
248 such perturbations are associated with fundamental organismal functions and a larger system-level  
249 reprogramming as they are apparent in all environments. The larger reach of these mutations could  
250 be connected to pleiotropic effects. Here we find not only that mutations in *E. coli*'s RNAP are  
251 complex, but also that their phenotype changes are highly specific to the mutation.

252 The use of RNAP as an experimental (model) system presents some advantages. First, we can  
253 select predictors with clear biological significance. These predictors are mainly related to either the  
254 performance of RNAP or its interaction with the alarmone ppGpp. Second, we can test the validity  
255 of our approach to earlier discussions on the fitness costs of RNAP mutations. Last, we can consider  
256 constitutive genes as an appropriate set of reporters. These genes are valid reporters of both direct  
257 effects on transcriptional efficiency and indirect ones on cell physiology (see below). Given that the  
258 sensitivity to the latter (the global program of transcription) is gene-dependent (Liang et al. 1999;  
259 Gerosa et al. 2013; Yubero and Poyatos 2020), we identify some genes within this class that are  
260 eventually better predictors than others through the same subset of variables to acceptable levels  
261 (but three genes fail terribly in the task; see Fig. S5 for analysis of specific molecular attributes).

262 We propose that genes that perform better are somehow sensitive to growth rate. This sensitivity  
263 could be read through the changes in a set of features, e.g., their expression, as in the following  
264 scenarios. First, a gene whose expression is highly robust to a mutation producing fitness costs  
265 will likely fail at predicting these costs, as even in the presence of such mutation there will be no  
266 observable change in the features. Second, a gene that is disrupted by the presence of the mutation  
267 will again be a bad predictor as its expression becomes irrelevant or unreliable. We hypothesize that  
268 in between these scenarios, there are a few genes whose predictability is maximal as they are only  
269 partially affected by the mutation. We verify this by quantifying the overall effect of a mutation  
270 on a gene as the sum of the squared relative change of the predictors included in the statistical  
271 framework (Fig.S6).

272 Moreover, a comparison of the expression response of a mutant to the WT for a *fixed* growth  
273 rate could further confirm constitutive genes as the best reporters of fitness costs. To this aim,  
274 we used RNA-seq data of the *rpoB* mutant E546V and its WT ancestor (Utrilla et al. 2016). The  
275 transcriptional changes produced by E546V at two different (fixed) growth rates correlate only  
276 slightly (Spearman's  $\rho = 0.12$ ; Fig. S7A). But most importantly, we found that this correlation  
277 greatly originates from the response of constitutive rather than regulated genes (Fig. S7B). Should  
278 this be a general case, it highlights not only that the transcriptional changes produced by a mutation  
279 in *rpoB* are dependent on the growth rate, but also that constitutive genes display a more coordi-  
280 nated response. Consequently, these genes are probable better fitness costs predictors than genes  
281 subjected to more specific regulation. In other words, the regulatory network can partially buffer  
282 the transcriptional changes produced by the mutant RNAP.

### 283 **Specific implications to the interplay between transcriptional efficiency and fitness cost in** 284 **Rif-resistant *rpoB* mutants**

285 Mutations in *rpoB* are most commonly found in antibiotic resistance and adaptive evolution  
286 experiments and have been studied extensively due to their implications in tuning fitness. More  
287 specifically, mutants producing fitness costs have been traditionally correlated to changes in the  
288 transcriptional efficiency of the mutant RNAPs. However, there are several issues with the previous

289 studies.

290 First, changes in transcriptional efficiency are promoter, environment, and (mutant) strain-  
291 dependent. A restricted number of any of these variables limits, therefore, the generality of these  
292 results. However, alleviating this largely increases the cost and difficulties of such studies. Our  
293 data set is a compromise that allows having a broader view of the impact of mutations in *rpoB* on  
294 the transcription of different promoters across multiple growth media.

295 Second, there exists a core dependency between growth rate and gene expression unaccounted  
296 for in previous studies. This relationship is most evident in the  $PA(\mu)$  profiles of constitutive genes  
297 as PA increases together with growth rate (Fig. 3) what anticipates a decrease in transcription  
298 when cells grow at a reduced rate even in the absence of mutations. Moreover, mutations in *rpoB*  
299 directly affect the transcriptional activity of the RNAP producing fitness costs, which in turn, further  
300 constrain the efficiency of the RNAP.

301 For this reason, total changes in PA have a direct contribution to the mutation, and what we  
302 called an *indirect* contribution of the fitness cost. To dissect these effects, one can control for  
303 the same growth rate enabling the quantification of changes in PA when WT and mutant strains  
304 share an equivalent "physiological state", i.e.,  $PA_D$ . To our knowledge, this is the first quantitative  
305 description of how RifR mutations modify the global transcriptional program in general, and  $PA(\mu)$   
306 profiles in particular (Fig. 3). That we observe the direct effect of mutations upon promoter activity,  
307  $PA_D$ , as an important determinant accentuates the intricate relationship between RNAP activity and  
308 fitness. Moreover, in the strain with the most visible fitness costs, there is a significant contribution  
309 to changes in  $PA_T$  from the limited availability of global resources.

### 310 **General implications.**

311 All these results show that decoupling the direct effect is fundamental for a better understanding  
312 of the transcriptional reprogramming observed in *rpoB* mutants and its impact on fitness costs.  
313 A partially similar approach was used to find a decisive shift in two other *rpoB* mutations whose  
314 RNAPs prioritize growth over hedging genes (Utrilla et al. 2016). The authors also compare the  
315 genome-wide expression between WT and mutants at a constant growth rate to control for a similar

316 physiological state.

317 This is a particular example of a more general problem in which the target of a mutation and a  
318 phenotype are coupled. Conditions in which a phenotypic change is produced not only by a direct  
319 perturbation of a molecular agent, but also by the system-level adaptation to such perturbation  
320 are widespread. Some of these systems, but not only, can be found in the context of fitness costs  
321 produced by antibiotic resistance mutations when such mutations occur in the molecular target of  
322 the antibiotic. Indeed, these perturbations potentially result in complex mutations since antibiotics  
323 may impede general cellular functions vital for bacterial growth, for example, DNA replication  
324 (quinolones), protein synthesis (macrolides), or transcription (rifamycins) as in our work. But this  
325 problem also applies to more specific mutations that also cause genome-scale rewiring. Many  
326 open questions remain on whether this rewiring is limited by particular genomic mechanisms,  
327 e.g., the possibility of transcriptional compensation (Kafri et al. 2005; Wong and Roth 2005), and  
328 thus signifies no fitness costs, or is eventually deleterious, and consequently involves additional  
329 costs (Kovács et al. 2020).

330 Finally, the fact that only a subset of the genes influenced by a complex mutation contributes to  
331 fitness appears to subscribe to a model in which extended phenotypic pleiotropy and fitness-relevant  
332 modularity coexist (Kinsler et al. 2020). Thus, we notice that many genes –molecular phenotypes–  
333 can be affected by these mutations implying extended phenotypic pleiotropy, like that also suggested  
334 by genome-wide association studies (Visscher and Yang 2016). However, only a few anticipate  
335 fitness hence displaying fitness-relevant modularity like that observed in many laboratory evolution  
336 experiments (Tenaillon et al. 2012). We need to continue studying these issues to finally discern  
337 how robust function encoded in cells shapes their response to genetic variation.

## 338 MATERIALS AND METHODS

### 339 Computational models of complex mutations

340 We used the genome-scale metabolic model of *E. coli* iAZ1260 (Feist et al. 2007) together with  
341 the Cobrapy toolbox (Ebrahim et al. 2013) to compute the fitness of the WT and mutants in an array  
342 of media. We simulated mutations on an enzyme by imposing a limit in the flux of reactions in  
343 which it participates. The limit is a fraction of the maximum flux observed across all media in the  
344 WT strain and it is fixed for a given mutant during growth in any media. We used minimal media  
345 supplemented with one of the 174 carbon sources found in the original study that support growth  
346 (Feist et al. 2007). The exchange rate for any carbon source was set equal to that of glucose (8  
347 mmol gDW<sup>-1</sup> h<sup>-1</sup>). We compute the relative global fitness as the slope of the robust least-squares  
348 fit (bisquare method) of the fitness of the mutant relative to the WT. Data points where the mutant  
349 is lethal are excluded from the fit. We also used the tool Escher to produce Fig. 1D (King et al.  
350 2015).

### 351 Strains and growth conditions

352 We used *E. coli* Rel606 as WT, and three mutant derivatives with the following amino acid  
353 substitutions in the gene *rpoB*; H526L, S512Y, and Q513P obtained previously through rifampicin  
354 resistance. In general, strains were retrieved from -80°C frozen stocks, plated in agar plates  
355 with selective media (when necessary), and grown overnight at 37°C. Reporter plasmids were  
356 extracted from a library (Zaslaver et al. 2006) and purified with the Qiagen Mini-prep kit following  
357 the manufacturer's protocol. Then, each strain was transformed with each reporter plasmid with  
358 TSS (Chung et al. 1989). When necessary, selective media for *rpoB* mutants was prepared with  
359 rifampicin (100 µg/ml), and for plasmid-bearing strains with kanamycin (50 µg/ml). Both antibiotics  
360 were used simultaneously when selecting *rpoB* mutants bearing the fluorescent reporter plasmid.  
361 All bacterial growth was at 30°C unless otherwise specified. Also, cultures were grown under the  
362 shade to prevent rifampicin degradation.

363 Growth media consisted of M9 minimal media supplemented i) with one of the following carbon  
364 sources at 0.5% (w/v): glycerol, sucrose, fructose, and glucose, and ii) either with or without amino

365 acids to a final concentration of 0.2% (w/v), thus making 8 different nutrient conditions in total.

366 Single colonies were pre-cultured in 1mL of M9 minimal media supplemented with glucose  
367 at 0.5%(w/v) for 3h. Then, 96-well flat-bottom plates filled with the corresponding media were  
368 inoculated with 20 $\mu$ L of pre-culture to a final volume of 220 $\mu$ L, we then added 30 $\mu$ L of mineral oil  
369 to prevent evaporation. Optical density at 600nm, and fluorescence 490/535nm when appropriate,  
370 were assayed in a Victor X2 (Perkin Elmer) at 5min intervals with orbital shaking (30s, 1mm) for  
371 more than 12h.

### 372 **Data processing and promoter activity modeling**

373 First, OD and GFP measurements were corrected for background levels by subtracting the value  
374 of blank wells filled with each corresponding growth media. GFP measurements were further cor-  
375 rected by subtracting the autofluorescence produced during the growth of the corresponding strain  
376 transformed with the pUA66 promoterless plasmid (Zaslaver et al. 2006). Only then, growth rate  
377 time series were computed as the two-point finite differences of  $\log_2(\text{OD})$ ,  $\mu(t) = \Delta \log_2(\text{OD})/\Delta t$   
378 (in doublings per hour), and promoter activities were computed as the two-point finite difference  
379 in time of fluorescence per OD unit,  $\text{PA}_{pl}(t) = \Delta \text{GFP}/\Delta t/\text{OD}$  (in units of GFP/OD/h). Balanced-  
380 growth data was computed from the mean time-series measurements of three technical replicates  
381 as the average value in a 1h time-window during observable exponential growth.

382 Promoter activity dependence on growth rate was modelled with a Michaelis-Menten equation  
383 as  $\text{PA}(\mu) = V_m\mu/(K_m + \mu)$  where  $V_m$  is the maximum promoter activity and  $K_m$  is the growth rate  
384 at which PA is half-maximal (Liang et al. 1999). Data from balanced growth was fit to this equation  
385 through robust least squares (bisquare) with an upper limit of  $K_m=3$  dbl/h to avoid overfitting linear  
386 profiles (Yubero and Poyatos 2020).

### 387 **ACKNOWLEDGEMENTS**

388 The authors would like to thank A. Couce and O. Tenaillon for strains. This work was supported  
389 by Ph.D. fellowship BES-2016-079127 (P.Y.) and grant PID2019-106116RB-I00 (J.F.P.) from the  
390 Spanish Ministerio de Ciencia e Innovación and the European Social Fund.



## REFERENCES

- 391
- 392 Barrick, J. E., Yu, D. S., Yoon, S. H., Jeong, H., Oh, T. K., Schneider, D., Lenski, R. E., and Kim,  
393 J. F. (2009). “Genome evolution and adaptation in a long-term experiment with *Escherichia*  
394 *coli*.” *Nature*, 461(7268), 1243–1247.
- 395 Cai, X.-C., Xi, H., Liang, L., Liu, J.-D., Liu, C.-H., Xue, Y.-R., and Yu, X.-Y. (2017). “Rifampicin-  
396 resistance mutations in the *rpoB* gene in *Bacillus velezensis* CC09 have pleiotropic effects.”  
397 *Frontiers in Microbiology*, 8, 178.
- 398 Chung, C. T., Niemela, S. L., and Miller, R. H. (1989). “One-step preparation of competent  
399 *Escherichia coli*: transformation and storage of bacterial cells in the same solution.” *Proceedings*  
400 *of the National Academy of Sciences*, 86(7), 2172–2175.
- 401 Dudley, A. M., Janse, D. M., Tanay, A., Shamir, R., and Church, G. M. (2005). “A global view of  
402 pleiotropy and phenotypically derived gene function in yeast.” *Molecular Systems Biology*, 1(1),  
403 2005.0001.
- 404 Ebrahim, A., Lerman, J. A., Palsson, B. Ø., and Hyduke, D. R. (2013). “Cobrapy: Constraints-based  
405 reconstruction and analysis for python.” *BMC Systems Biology*, 7(1), 74.
- 406 Falconer, D. and Mackay, T. (1996). *Introduction to Quantitative Genetics*. Prentice-Hall, Harlow,  
407 UK.
- 408 Feist, A. M., Henry, C. S., Reed, J. L., Krummenacker, M., Joyce, A. R., Karp, P. D., Broadbelt, L. J.,  
409 Hatzimanikatis, V., and Palsson, B. Ø. (2007). “A genome-scale metabolic reconstruction for  
410 *Escherichia coli* K-12 MG1655 that accounts for 1260 ORFs and thermodynamic information.”  
411 *Molecular Systems Biology*, 3(1), 121.
- 412 Garibyan, L., Huang, T., Kim, M., Wolff, E., Nguyen, A., Nguyen, T., Diep, A., Hu, K., Iverson,  
413 A., Yang, H., and Miller, J. H. (2003). “Use of the *rpoB* gene to determine the specificity of base  
414 substitution mutations on the *Escherichia coli* chromosome.” *DNA Repair*, 2(5), 593–608.
- 415 Gerosa, L., Kochanowski, K., Heinemann, M., and Sauer, U. (2013). “Dissecting specific and  
416 global transcriptional regulation of bacterial gene expression.” *Molecular Systems Biology*, 9(1),  
417 658.

- 418 Goldstein, B. P. (2014). “Resistance to rifampicin: a review.” *The Journal of Antibiotics*, 67(9),  
419 625–630.
- 420 Griffiths, A. J., Wessler, S. R., Carrol, S. B., and Doebley, J. (2015). *Introduction to Genetic*  
421 *Analysis, 11th Ed.* W. H. Freeman & Co, New York.
- 422 He, X. and Zhang, J. (2005). “Toward a molecular understanding of pleiotropy.” *Genetics*, 173(1),  
423 1885–1891.
- 424 Hirsch, M. and Elliott, T. (2002). “Role of ppGpp in *rpoS* stationary-phase regulation in *Escherichia*  
425 *coli*.” *Journal of bacteriology*, 184(18), 5077–5087.
- 426 Irving, S. E. and Corrigan, R. M. (2018). “Triggering the stringent response: signals responsible  
427 for activating (p)ppGpp synthesis in bacteria.” *Microbiology*, 164(3), 268–276.
- 428 Jin, D. J. and Gross, C. A. (1988). “Mapping and sequencing of mutations in the *Escherichia coli*  
429 *rpoB* gene that lead to rifampicin resistance.” *Journal of Molecular Biology*, 202(1), 45–58.
- 430 Jin, D. J. and Gross, C. A. (1989). “Characterization of the pleiotropic phenotypes of rifampin-  
431 resistant *rpoB* mutants of *Escherichia coli*.” *Journal of bacteriology*, 171(9), 5229–5231.
- 432 Johnson, J. B. and Omland, K. S. (2004). “Model selection in ecology and evolution.” *Trends in*  
433 *Ecology & Evolution*, 19(2), 101–108.
- 434 Kafri, R., Bar-Even, A., and Pilpel, Y. (2005). “Transcription control reprogramming in genetic  
435 backup circuits.” *Nature Genetics*, 37(3), 295–299.
- 436 Karthik, M., Meenakshi, S., and Munavar, M. (2019). “Unveiling the molecular basis for pleiotropy  
437 in selected rif mutants of *Escherichia coli*: Possible role for tyrosine in the rif binding pocket  
438 and fast movement of RNA polymerase.” *Gene*, 713, 143951.
- 439 King, Z. A., Dräger, A., Ebrahim, A., Sonnenschein, N., Lewis, N. E., and Palsson, B. Ø. (2015).  
440 “Escher: A web application for building, sharing, and embedding data-rich visualizations of  
441 biological pathways.” *PLOS Computational Biology*, 11(8), e1004321.
- 442 Kinsler, G., Geiler-Samerotte, K., and Petrov, D. A. (2020). “Fitness variation across subtle envi-  
443 ronmental perturbations reveals local modularity and global pleiotropy of adaptation.” *eLife*, 9,  
444 e61271.

- 445 Klumpp, S. and Hwa, T. (2008). “Growth-rate-dependent partitioning of RNA polymerases in  
446 bacteria.” *Proceedings of the National Academy of Sciences*, 105(51), 20245–20250.
- 447 Klumpp, S., Zhang, Z., and Hwa, T. (2009). “Growth rate-dependent global effects on gene  
448 expression in bacteria.” *Cell*, 139(7), 1366–1375.
- 449 Kovács, K., Farkas, Z., Bajić, D., Kalapis, D., Daraba, A., Almási, K., Kintsés, B., Bódi, Z.,  
450 Notebaart, R. A., Poyatos, J. F., Kemmeren, P., Holstege, F. C. P., Pál, C., and Papp, B. (2020).  
451 “Suboptimal Global Transcriptional Response Increases the Harmful Effects of Loss-of-Function  
452 Mutations.” *Molecular Biology and Evolution*, msaa280.
- 453 Liang, S.-T., Bipatnath, M., Xu, Y.-C., Chen, S.-L., Dennis, P., Ehrenberg, M., and Bremer, H.  
454 (1999). “Activities of constitutive promoters in *Escherichia coli*.” *Journal of Molecular Biology*,  
455 292(1), 19 – 37.
- 456 Maaløe, O. (1979). *Regulation of the Protein-Synthesizing Machinery—Ribosomes, tRNA, Factors,*  
457 *and So On*. Springer US, Boston, MA, 487–542.
- 458 Paul, B. J., Barker, M. M., Ross, W., Schneider, D. A., Webb, C., Foster, J. W., and Gourse, R. L.  
459 (2004). “DksA: A critical component of the transcription initiation machinery that potentiates  
460 the regulation of rRNA promoters by ppGpp and the initiating ntp.” *Cell*, 118(3), 311–322.
- 461 Potrykus, K., Murphy, H., Philippe, N., and Cashel, M. (2011). “ppGpp is the major source of  
462 growth rate control in *E. coli*.” *Environmental Microbiology*, 13(3), 563–575.
- 463 Qi, Q., Preston, G. M., and MacLean, R. C. (2014). “Linking system-wide impacts of RNA  
464 polymerase mutations to the fitness cost of rifampin resistance in *Pseudomonas aeruginosa*.”  
465 *mBio*, 5(6).
- 466 Reynolds, M. G. (2000). “Compensatory evolution in rifampin-resistant *Escherichia coli*.” *Genetics*,  
467 156(4), 1471–1481.
- 468 Sanchez-Vazquez, P., Dewey, C. N., Kitten, N., Ross, W., and Gourse, R. L. (2019). “Genome-wide  
469 effects on *Escherichia coli* transcription from ppGpp binding to its two sites on rna polymerase.”  
470 *Proceedings of the National Academy of Sciences*, 116(17), 8310–8319.
- 471 Schaechter, M., Maaløe, O., and Kjeldgaard, N. (1958). “Dependency on medium and temperature

- 472 of cell size and chemical composition during balanced growth of *Salmonella typhimurium*.” *J*  
473 *Gen Microbiol*, 19, 592–606.
- 474 Tenaillon, O., Rodriguez-Verdugo, A., Gaut, R. L., McDonald, P., Bennett, A. F., Long, A. D., and  
475 Gaut, B. S. (2012). “The Molecular Diversity of Adaptive Convergence.” *Science*, 335(6067),  
476 457–461.
- 477 Tóth, I., Csík, M., and Emçdy, L. (2003). “Spontaneous antibiotic resistance mutation associated  
478 pleiotropic changes in *Escherichia coli* O157:H7.” *Acta Veterinaria Hungarica*, 51(1), 29–44.
- 479 Trauner, A., Banaei-Esfahani, A., Gygli, S. M., Warmer, P., Feldmann, J., Shafieechashmi, S.,  
480 Eschbach, K., Zampieri, M., Borrell, S., Collins, B. C., Beisel, C., Aebersold, R., and Gagneux,  
481 S. (2018). “Resource misallocation as a mediator of fitness costs in antibiotic resistance.” *bioRxiv*.
- 482 Utrilla, J., O’Brien, E. J., Chen, K., McCloskey, D., Cheung, J., Wang, H., Armenta-Medina, D.,  
483 Feist, A. M., and Palsson, B. Ø. (2016). “Global rebalancing of cellular resources by pleiotropic  
484 point mutations illustrates a multi-scale mechanism of adaptive evolution.” *Cell Systems*, 2(4),  
485 260–271.
- 486 Visscher, P. M. and Yang, J. (2016). “A plethora of pleiotropy across complex traits.” *Nature*  
487 *Genetics*, 48(7), 707–708.
- 488 Wong, S. L. and Roth, F. P. (2005). “Transcriptional Compensation for Gene Loss Plays a Minor  
489 Role in Maintaining Genetic Robustness in *Saccharomyces cerevisiae*.” *Genetics*, 171(2), 829–  
490 833.
- 491 Wytock, T. P., Zhang, M., Jinich, A., Fiebig, A., Crosson, S., and Motter, A. E. (2020). “Extreme  
492 antagonism arising from gene-environment interactions.” *Biophysical Journal*, 119(10), 2074 –  
493 2086.
- 494 Yubero, P. and Poyatos, J. F. (2020). “The impact of global transcriptional regulation on bacterial  
495 gene order.” *iScience*, 23(4).
- 496 Zaslaver, A., Bren, A., Ronen, M., Itzkovitz, S., Kikoin, I., Shavit, S., Liebermeister, W., Surette,  
497 M. G., and Alon, U. (2006). “A comprehensive library of fluorescent transcriptional reporters  
498 for *Escherichia coli*.” *Nature Methods*, 3(8), 623–628.

- 499 Zhou, Y. N. and Jin, D. J. (1998). “The *rpoB* mutants destabilizing initiation complexes at stringently  
500 controlled promoters behave like “stringent” RNA polymerases in *Escherichia coli*.” *Proceedings*  
501 *of the National Academy of Sciences*, 95(6), 2908–2913.
- 502 Zhu, M. and Dai, X. (2019). “Growth suppression by altered (p)ppGpp levels results from non-  
503 optimal resource allocation in *Escherichia coli*.” *Nucleic Acids Research*, 47(9), 4684–4693.

|                          | (Intercept) | $PA_T$  | $PA_D$   | $V_m$   | $K_m$    | $PA_f$  | $p_f$    | $\partial_t \mu$ | RMSE  |
|--------------------------|-------------|---------|----------|---------|----------|---------|----------|------------------|-------|
| <i>hisL</i>              | 0.00(6)     | 0.32(8) | -0.54(8) | 0.3(1)  | -        | -       | -0.11(5) | -                | 0.096 |
| <i>rsd</i>               | -1.6(4)     | 0.85(4) | -0.60(4) | -2.3(5) | -3.91(4) | -       | -        | -                | 0.114 |
| <i>serW</i>              | -0.13(4)    | 0.32(8) | -0.3(1)  | -       | -        | -       | -0.26(5) | -                | 0.146 |
| <i>rpsT</i>              | -0.09(3)    | -       | -        | -       | -        | -       | -0.31(6) | -                | 0.149 |
| <i>maoP</i>              | -0.18(7)    | -       | -0.07(3) | -0.3(2) | -        | -       | -        | -0.19(4)         | 0.188 |
| <i>rpsB</i>              | -0.11(5)    | -       | -        | 0.4(1)  | -        | -       | -0.19(3) | -                | 0.189 |
| <i>mltD</i>              | -0.10(5)    | 0.5(1)  | -0.6(1)  | -       | -        | -       | -        | -                | 0.225 |
| <i>pyrG</i>              | -0.11(6)    | 0.4(1)  | -0.5(1)  | -       | -        | -       | -0.10(6) | -                | 0.230 |
| <i>corA</i> <sup>†</sup> | -0.5(3)     | -       | -3.0(5)  | -       | 1.7(4)   | -1.8(4) | 3.7(6)   | -2.1(7)          | 0.933 |
| <i>pyrB</i> <sup>†</sup> | 1.7(6)      | -       | -        | -       | -        | -       | 2.1(9)   | -                | 1.75  |
| <i>pcnB</i> <sup>†</sup> | 0.5(4)      | -       | -        | -       | -        | -       | -        | -                | 1.89  |
| Median                   | -0.10       | 0.40    | -0.54    | 0       | -1.1     | -1.8    | -0.11    | -1.17            | 0.189 |

**Table 1. Linear models for the anticipation of fitness costs.** We show the coefficients of the predictors (columns) obtained for the data set of each promoter (rows). The number in parentheses is the standard error of the coefficient in the last decimal digit shown. The last column contains the root mean squared errors as a measure of goodness of fit. Models were selected in a step-wise manner following the Bayesian information criterion (Methods). † genes with largest rmse that fit poorly the fitness costs.

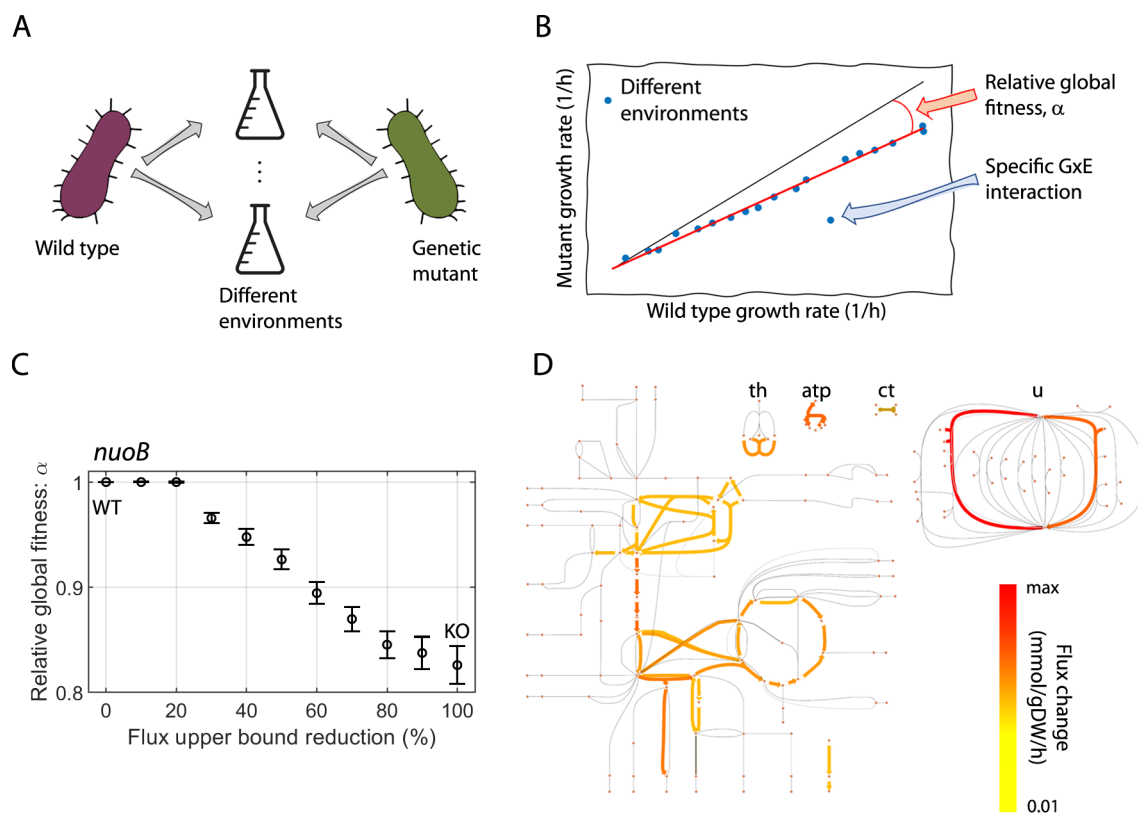

**Figure 1. Complex mutations have a characteristic *environmental fitness cost map* because they affect globally.** (A) Environmental fitness cost maps are obtained by measuring, and comparing, the phenotype of a genetic mutant and its WT relative in different environments. In our case, we focus on growth rate. (B) Sketch of an environmental fitness cost map. It facilitates the identification of complex mutations and specific gene-environment interactions (GxE). While the former is a rescaling of the fitness in most environments (red line, relative global fitness  $\alpha$ ), the latter are shown as outliers from this trend. (C) We computed the value of  $\alpha$  for multiple mutants of *nuoB* using a computational metabolic model of *E. coli* (Methods). Error bars denote the 95% CI of the slope after robustly fitting data to a linear trend (as in panel B; Methods; 100% flux reduction denotes a knockout, KO). (D) Sketch of *E. coli*'s *nuoB* KO metabolism with the median flux change across all environments. We show only the 10% of reactions that are most affected by the mutation. Transhydrogenase (th), ATP synthase (atp), carbonate (ct), and ubiquinone reduction/oxidation (u) pathways are also shown.



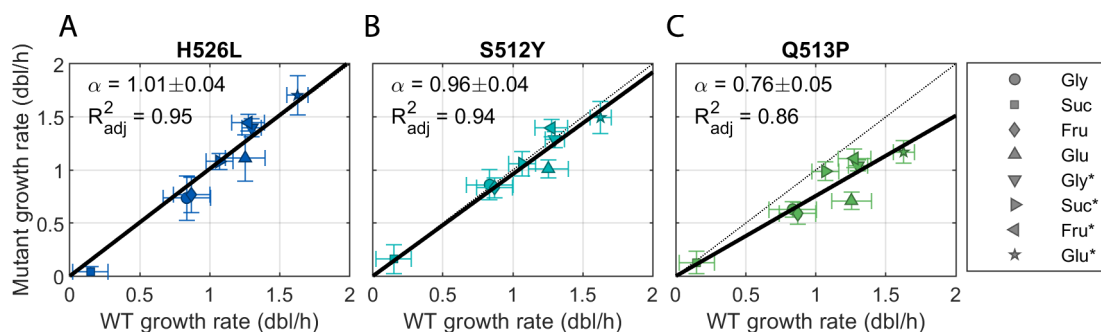

**Figure 2. Experimental *rpoB* mutants display global fitness costs.** (A-C) Growth rate of the three *rpoB* mutant strains (H526L, S512Y, and Q513P) and their WT relative in eight different growth media (markers, asterisks denote the addition of casamino acids; Methods). Their fitness is proportional to that of the WT, and hence can be described by their relative global fitness  $\alpha$  (with its 95% CI interval). Error bars denote one standard deviation among 12 replicates.

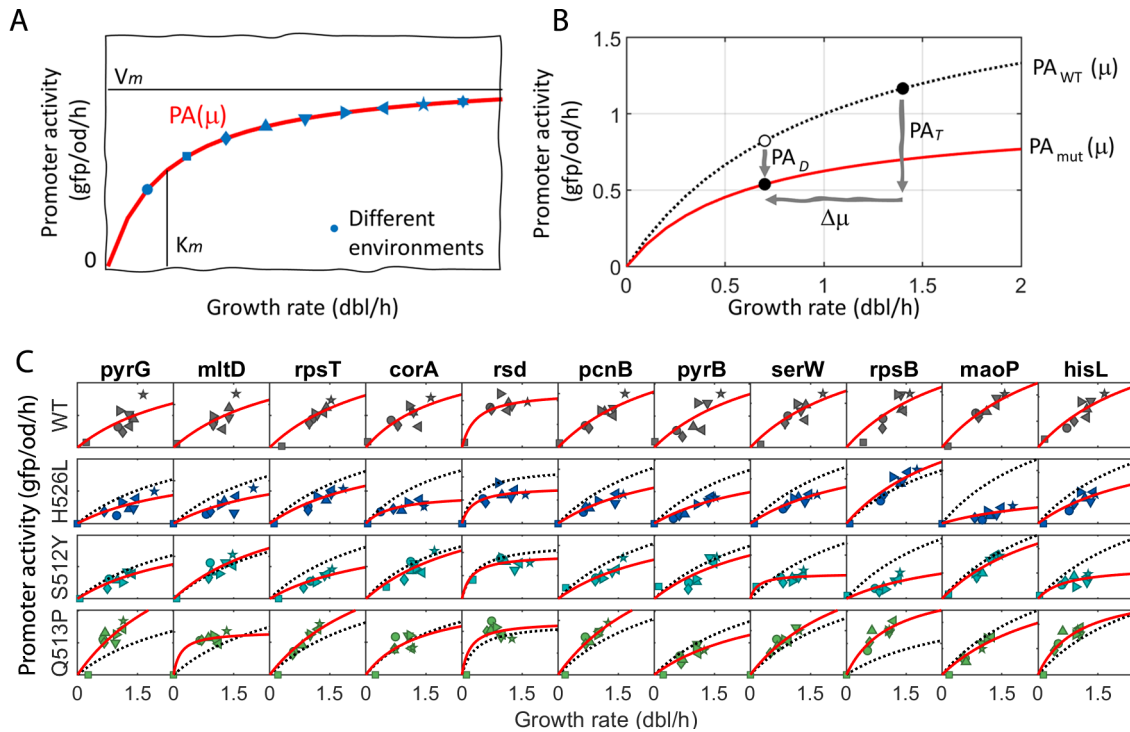

**Figure 3. Uncoupling the total and direct effects of mutations on promoter activity.** (A) Sketch illustrating the typical growth-rate dependency of the promoter activity of constitutive genes (red line). These are obtained from PA and growth-rate values during balanced growth in media with different carbon sources (blue symbols) and they are characterized by  $V_m$  (the maximal PA), and  $K_m$  (growth rate at which PA is half-maximal). (B) Sketch depicting the difference between the total and direct effects of a mutation,  $PA_T$ , and  $PA_D$  respectively.  $PA_T$  measures the change in PA between the WT and the mutant in the same environment (black solid circles) but at different growth rates due to fitness costs ( $\Delta\mu$ ). Quantifying the  $PA(\mu)$  profiles in the WT and mutant (black dotted, and red solid lines respectively) enables us to capture  $PA_D$ , which measures the expected change in PA when WT and mutant grow at the same rate. (C)  $PA(\mu)$  profiles (red lines) of eleven constitutive genes in an array of growth media in all four strains (markers and colors, respectively, as in Fig. 2). The corresponding profile of the WT is also shown for comparability (black dotted line).

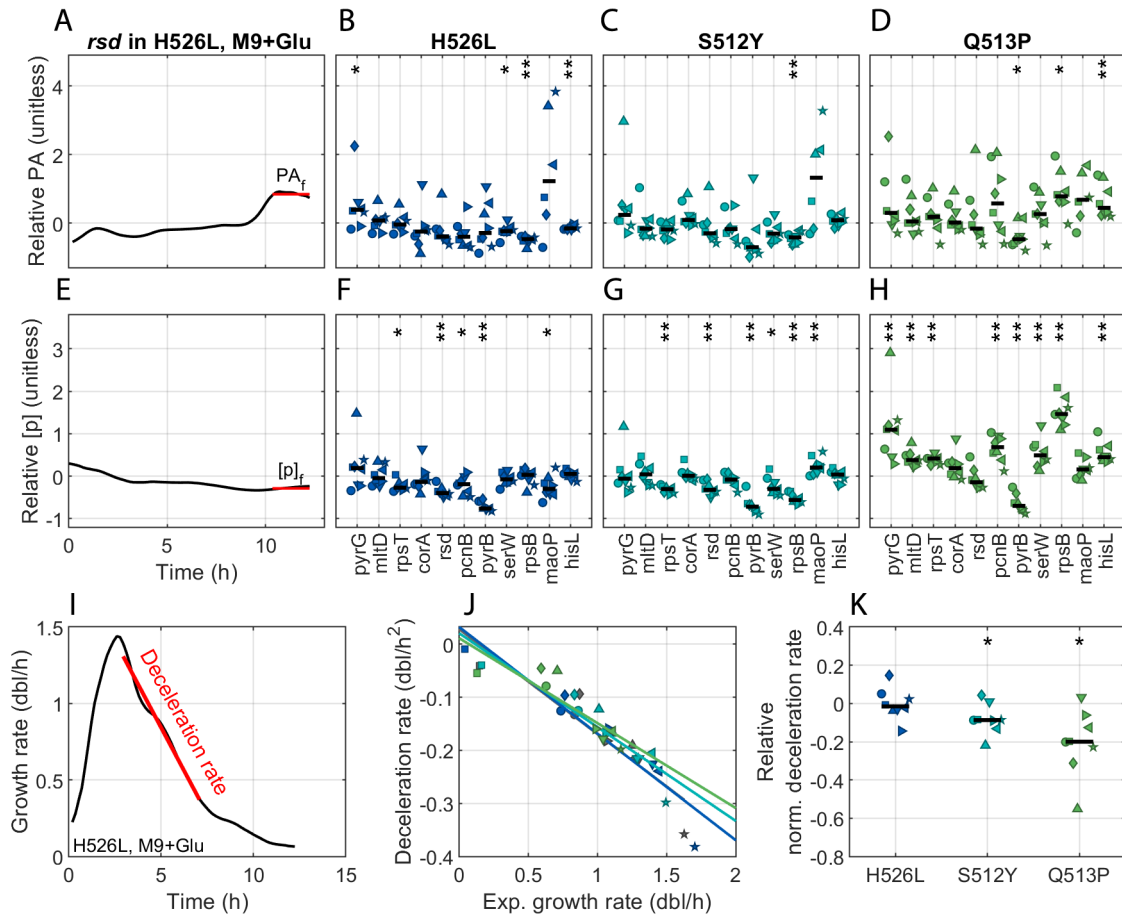

**Figure 4. Promoter activity and protein concentration during stationary phase, and the deceleration rate constitute additional potential predictors of fitness costs.** (A) Relative final promoter activity (ratio mutant  $PA_f$  over WT) of the *rsd* gene. (B-D) Relative  $PA_f$  of all promoters and mutant backgrounds (x-axis). (E) Relative final protein level (ratio mutant  $[p]_f$  over WT) of *rsd*. (F-H) Relative  $[p]_f$  of all promoters and mutant backgrounds (x-axis). (I) deceleration rate during growth in M9 and glucose of H526L. (J) Deceleration rates correlate strongly with the exponential growth rates reached in that particular media (markers) in all strains (colors; Pearson's  $\rho < -0.86$  and  $p < 0.01$  in all strains). (K) Even when controlling for this correlation, the relative deceleration rates of different mutants differ significantly. Note that while the first two scores are measured during the last two hours of the experiment when cultures are in stationary phase (red horizontal lines), the deceleration rate is computed from the change in growth rate right after the exponential phase (slope of the red line). In all panels, we tested a homogeneous response, either positive or negative, across all environments using a two-sided Wilcoxon sign rank test for medians (\*  $p < 0.05$  and \*\*  $p < 0.01$ ). Colors and markers denote strain and media composition as in Fig.2.

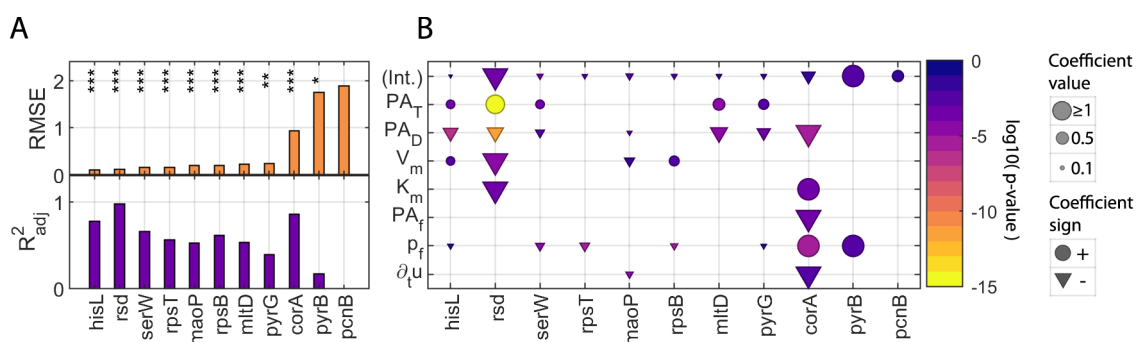

**Figure 5. Anticipating fitness costs from molecular predictors of a variety of promoters.** To predict the fitness costs of three *rpoB* mutants growing in eight different media conditions, we used a linear model with step-wise addition and subtraction of predictors following the Bayesian information criterion to avoid overfitting. **(A)** Goodness of fit as described by the root mean squared error (RMSE, top) and the adjusted  $R^2$  ( $R^2_{adj}$ , bottom) of the final linear models (\*  $p < 0.05$ , \*\*  $p < 0.01$  and \*\*\*  $p < 0.001$ ). **(B)** Model coefficient values (size, clipped to 1 for comparability, see Table 1), sign (marker), and significance (t-test p-value; colors are proportional to its  $\log_{10}$ ) of each predictor and each promoter in the final linear models.
